# Supplementary material for: Midline vs Peripherally Inserted Central Catheter for Outpatient Parenteral Antimicrobial Therapy
Source: PubMed Central journal article supplement (PMC11555572; doi:10.1001/jamainternmed.2024.5984), 2024-11-11
Supplement: jamainternmed-e245984-s001.pdf [file jamainternmed-e245984-s001.pdf]

## Supplemental Online Content

Paje D, Walzl E, Heath M, et al. Midline vs peripherally inserted central catheter for outpatient parenteral antimicrobial therapy. *JAMA Intern Med*. Published online November 11, 2024. doi:10.1001/jamainternmed.2024.5984

**eFigure 1.** Complications in Patients Receiving OPAT  $\leq 14$  Days by Device Type

**eFigure 2.** Complications in Patients Receiving OPAT  $> 14$  Days by Device Type

**eTable 1.** Hazards of OPAT Device Complications Among Patients Discharged to Home by Device Type

**eTable 2.** Hazards of OPAT Device Complications Among Devices With Dwell Time of  $\leq 14$  Days by Device Type

**eTable 3.** Hazards of OPAT Device Complications Among Devices With Dwell Time of  $> 14$  Days by Device Type

This supplementary material has been provided by the authors to give readers additional information about their work.

**eFigure 1.** Complications in Patients Receiving OPAT ≤14 Days by Device Type

**A. Major Complications**

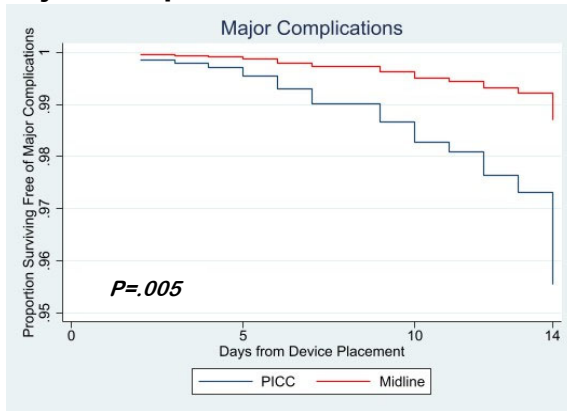

**B. Minor Complications**

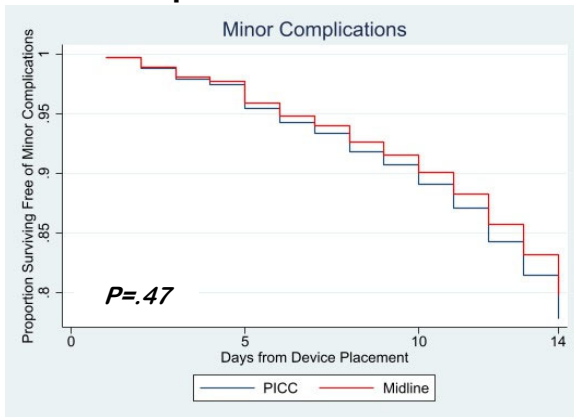

**C. Device Failure**

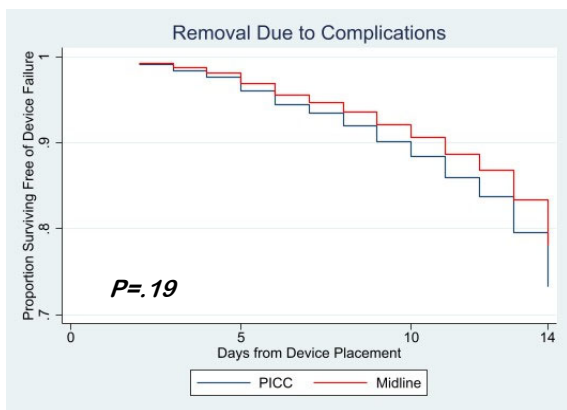

**eFigure 2.** Complications in Patients Receiving OPAT >14 Days by Device Type

**Major Complications**

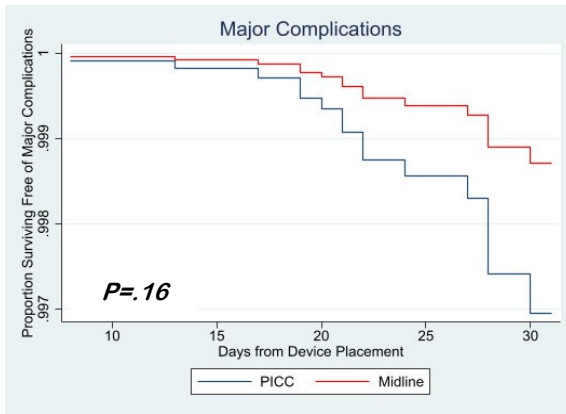

**A. Minor Complications**

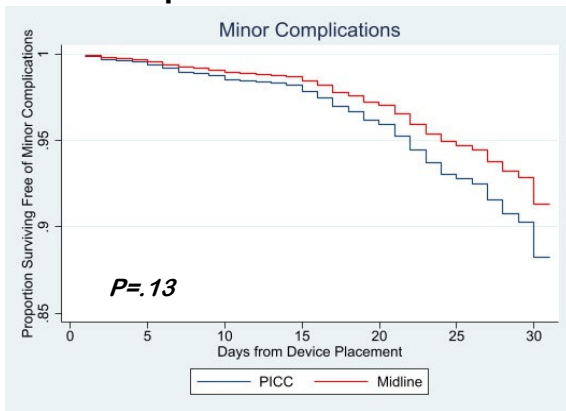

**B. Device Failure**

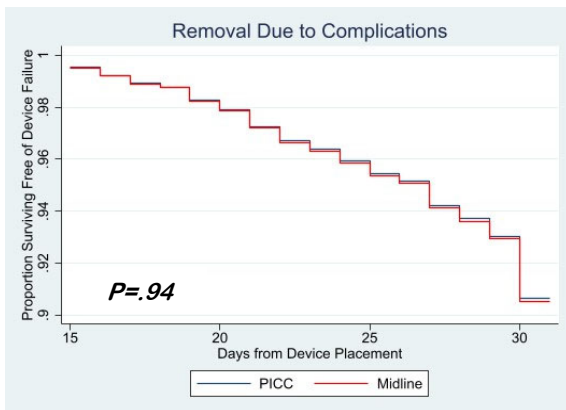

**eTable 1.** Hazards of OPAT Device Complications Among Patients Discharged to Home by Device Type

| Outcomes                               | Total<br>(N = 1,964) | Midline<br>(N = 1,413) | PICC<br>(N = 551)   | Adjusted<br>Hazard<br>Ratio* | 95% Confidence Interval |             | P-value |
|----------------------------------------|----------------------|------------------------|---------------------|------------------------------|-------------------------|-------------|---------|
|                                        | n<br>(per 1,000 cd)  | n<br>(per 1,000 cd)    | n<br>(per 1,000 cd) |                              | Lower Limit             | Upper Limit |         |
| <b>Any Major Complication</b>          | 24 (0.8)             | 9 (0.47)               | 15 (1.38)           | 0.35                         | 0.14                    | 0.90        | .03     |
| Catheter-related BSI                   | 9 (0.3)              | 2 (0.1)                | 7 (0.65)            | 0.07                         | 0.01                    | 1.14        | .06     |
| Catheter-related VTE                   | 16 (0.53)            | 7 (0.36)               | 9 (0.83)            | 0.51                         | 0.16                    | 1.60        | .25     |
| Upper extremity DVT                    | 13 (0.43)            | 7 (0.36)               | 6 (0.55)            | 0.51                         | 0.16                    | 1.60        | .25     |
| Pulmonary embolism                     | 3 (0.1)              | 0 (0)                  | 3 (0.28)            | NA                           | NA                      | NA          | NA      |
| <b>Any Minor Complication</b>          | 228 (7.57)           | 153 (7.94)             | 75 (6.92)           | 1.18                         | 0.87                    | 1.61        | .29     |
| Catheter dislodgement                  | 77 (2.56)            | 51 (2.65)              | 26 (2.4)            | 1.22                         | 0.72                    | 2.09        | .46     |
| Catheter occlusion                     | 63 (2.09)            | 37 (1.92)              | 26 (2.4)            | 1.06                         | 0.54                    | 2.11        | .86     |
| Catheter tip migration                 | 46 (1.53)            | 20 (1.04)              | 26 (2.4)            | 0.39                         | 0.20                    | 0.74        | .004    |
| Infiltration                           | 6 (0.2)              | 6 (0.31)               | NA                  | NA                           | NA                      | NA          | NA      |
| Superficial thrombosis                 | 14 (0.47)            | 14 (0.73)              | 0 (0)               | NA                           | NA                      | NA          | NA      |
| Exit site concerns                     | 64 (2.13)            | 56 (2.91)              | 8 (0.74)            | 3.10                         | 1.43                    | 6.73        | .004    |
| <b>Any Major or Minor Complication</b> | 247 (8.2)            | 159 (8.25)             | 88 (8.12)           | 1.04                         | 0.78                    | 1.39        | .79     |
| <b>Device Failure</b>                  | 201 (6.68)           | 141 (7.32)             | 60 (5.54)           | 1.46                         | 1.04                    | 2.06        | <.001   |

**Legend:** OPAT=outpatient parenteral antimicrobial therapy; PICC=peripherally inserted central catheter; cd=catheter-days; BSI=bloodstream infection; VTE=venous thromboembolism; DVT=deep vein thrombosis; \*Hazard Ratio=Cox Proportional Hazards model adjusted for age, sex, Charlson comorbidity score, history of VTE, history of central line-associated bloodstream infection, active malignancy, receipt of anticoagulants, presence of another central vein catheter, number of catheter lumens, and catheter size, with random effects for each hospital

**eTable 2.** Hazards of OPAT Device Complications Among Devices With Dwell Time of ≤14 Days by Device Type

| Outcomes                               | Total<br>(N = 1,628) | Midline<br>(N = 1,324) | PICC<br>(N = 304)   | Adjusted<br>Hazard<br>Ratio* | 95% Confidence Interval |             | P-value |
|----------------------------------------|----------------------|------------------------|---------------------|------------------------------|-------------------------|-------------|---------|
|                                        | n<br>(per 1,000 cd)  | n<br>(per 1,000 cd)    | n<br>(per 1,000 cd) |                              | Lower Limit             | Upper Limit |         |
| <b>Any Major Complication</b>          | 28 (1.83)            | 12 (0.98)              | 16 (5.22)           | 0.29                         | 0.12                    | 0.68        | .005    |
| Catheter-related BSI                   | 10 (0.66)            | 3 (0.25)               | 7 (2.28)            | 0.18                         | 0.03                    | 1.10        | .06     |
| Catheter-related VTE                   | 20 (1.31)            | 9 (0.74)               | 11 (3.59)           | 0.35                         | 0.13                    | 0.99        | .048    |
| Upper extremity DVT                    | 18 (1.18)            | 9 (0.74)               | 9 (2.94)            | 0.36                         | 0.13                    | 1.00        | .05     |
| Pulmonary embolism                     | 2 (0.13)             | 0 (0)                  | 2 (0.65)            | NA                           | NA                      | NA          | NA      |
| <b>Any Minor Complication</b>          | 200 (13.11)          | 156 (12.79)            | 44 (14.35)          | 0.876                        | 0.61                    | 1.25        | .47     |
| Catheter dislodgement                  | 85 (5.57)            | 60 (4.92)              | 25 (8.15)           | 0.53                         | 0.32                    | 0.89        | .02     |
| Catheter occlusion                     | 36 (2.36)            | 29 (2.38)              | 7 (2.28)            | 1.57                         | 0.53                    | 4.68        | .42     |
| Catheter tip migration                 | 29 (1.9)             | 20 (1.64)              | 9 (2.94)            | 0.47                         | 0.20                    | 1.08        | .08     |
| Infiltration                           | 7 (0.46)             | 7 (0.57)               | NA                  | NA                           | NA                      | NA          | NA      |
| Superficial thrombosis                 | 17 (1.11)            | 15 (1.23)              | 2 (0.65)            | 1.67                         | 0.35                    | 8.09        | .52     |
| Exit site concerns                     | 60 (3.93)            | 55 (4.51)              | 5 (1.63)            | 2.93                         | 1.13                    | 7.61        | .03     |
| <b>Any Major or Minor Complication</b> | 219 (14.35)          | 162 (13.28)            | 57 (18.59)          | 0.74                         | 0.53                    | 1.02        | .06     |
| <b>Device Failure</b>                  | 203 (13.3)           | 151 (12.38)            | 52 (16.96)          | 0.79                         | 0.56                    | 1.12        | .19     |

**Legend:** OPAT=outpatient parenteral antimicrobial therapy; PICC=peripherally inserted central catheter; cd=catheter-days; BSI=bloodstream infection; VTE=venous thromboembolism; DVT=deep vein thrombosis; \*Hazard Ratio=Cox Proportional Hazards model adjusted for age, sex, Charlson comorbidity score, history of VTE, history of central line-associated bloodstream infection, active malignancy, receipt of anticoagulants, presence of another central vein catheter, number of catheter lumens, and catheter size, with random effects for each hospital

**eTable 3.** Hazards of OPAT Device Complications Among Devices With Dwell Time of >14 Days by Device Type

| Outcomes                                                                                                                                                                                                                                                                                                                                                                                                                                                                                                                                                                | Total<br>(N = 1,196) | Midline<br>(N = 675) | PICC<br>(N = 521)   | Adjusted<br>Hazard<br>Ratio* | 95% Confidence Interval |             | P-value |
|-------------------------------------------------------------------------------------------------------------------------------------------------------------------------------------------------------------------------------------------------------------------------------------------------------------------------------------------------------------------------------------------------------------------------------------------------------------------------------------------------------------------------------------------------------------------------|----------------------|----------------------|---------------------|------------------------------|-------------------------|-------------|---------|
|                                                                                                                                                                                                                                                                                                                                                                                                                                                                                                                                                                         | n<br>(per 1,000 cd)  | n<br>(per 1,000 cd)  | n<br>(per 1,000 cd) |                              | Lower Limit             | Upper Limit |         |
| <b>Any Major Complication</b>                                                                                                                                                                                                                                                                                                                                                                                                                                                                                                                                           | 16 (0.58)            | 4 (0.27)             | 12 (0.95)           | 0.42                         | 0.13                    | 1.40        | .16     |
| Catheter-related BSI                                                                                                                                                                                                                                                                                                                                                                                                                                                                                                                                                    | 10 (0.36)            | 2 (0.13)             | 8 (0.64)            | 0.33                         | 0.06                    | 1.81        | .20     |
| Catheter-related VTE                                                                                                                                                                                                                                                                                                                                                                                                                                                                                                                                                    | 6 (0.22)             | 2 (0.13)             | 4 (0.32)            | 0.92                         | 0.13                    | 6.60        | .94     |
| Upper extremity DVT                                                                                                                                                                                                                                                                                                                                                                                                                                                                                                                                                     | 4 (0.15)             | 2 (0.13)             | 2 (0.16)            | 0.93                         | 0.13                    | 6.61        | .94     |
| Pulmonary embolism                                                                                                                                                                                                                                                                                                                                                                                                                                                                                                                                                      | 2 (0.07)             | 0 (0)                | 2 (0.16)            | NA                           | NA                      | NA          | NA      |
| <b>Any Minor Complication</b>                                                                                                                                                                                                                                                                                                                                                                                                                                                                                                                                           | 120 (4.37)           | 50 (3.37)            | 70 (5.56)           | 0.73                         | 0.49                    | 1.09        | .13     |
| Catheter dislodgement                                                                                                                                                                                                                                                                                                                                                                                                                                                                                                                                                   | 35 (1.28)            | 15 (1.01)            | 20 (1.59)           | 1.00                         | 0.49                    | 2.04        | .99     |
| Catheter occlusion                                                                                                                                                                                                                                                                                                                                                                                                                                                                                                                                                      | 46 (1.68)            | 16 (1.08)            | 30 (2.38)           | 0.62                         | 0.28                    | 1.38        | .24     |
| Catheter tip migration                                                                                                                                                                                                                                                                                                                                                                                                                                                                                                                                                  | 29 (1.06)            | 2 (0.13)             | 27 (2.14)           | 0.04                         | 0.01                    | 0.29        | .001    |
| Infiltration                                                                                                                                                                                                                                                                                                                                                                                                                                                                                                                                                            | 2 (0.07)             | 2 (0.13)             | NA                  | NA                           | NA                      | NA          | NA      |
| Superficial thrombosis                                                                                                                                                                                                                                                                                                                                                                                                                                                                                                                                                  | 1 (0.04)             | 1 (0.07)             | 0 (0)               | NA                           | NA                      | NA          | NA      |
| Exit site concerns                                                                                                                                                                                                                                                                                                                                                                                                                                                                                                                                                      | 21 (0.77)            | 17 (1.14)            | 4 (0.32)            | 2.76                         | 0.89                    | 8.61        | .08     |
| <b>Any Major or Minor Complication</b>                                                                                                                                                                                                                                                                                                                                                                                                                                                                                                                                  | 133 (4.85)           | 53 (3.57)            | 80 (6.35)           | 0.69                         | 0.47                    | 1.01        | .05     |
| <b>Device Failure</b>                                                                                                                                                                                                                                                                                                                                                                                                                                                                                                                                                   | 88 (3.21)            | 40 (2.69)            | 48 (3.81)           | 1.02                         | 0.64                    | 1.61        | .94     |
| <b>Legend:</b> OPAT=outpatient parenteral antimicrobial therapy; PICC=peripherally inserted central catheter; cd=catheter-days; BSI=bloodstream infection; VTE=venous thromboembolism; DVT=deep vein thrombosis; *Hazard Ratio=Cox Proportional Hazards model adjusted for age, sex, Charlson comorbidity score, history of VTE, history of central line-associated bloodstream infection, active malignancy, receipt of anticoagulants, presence of another central vein catheter, number of catheter lumens, and catheter size, with random effects for each hospital |                      |                      |                     |                              |                         |             |         |
