# Supplementary material for: Midline vs Peripherally Inserted Central Catheter for Outpatient Parenteral Antimicrobial Therapy
Source: PubMed Central journal article supplement (PMC11555572; doi:10.1001/jamainternmed.2024.5984), 2024-11-11
Supplement: jamainternmed-e245984-s002.pdf [file jamainternmed-e245984-s002.pdf]

## Data Sharing Statement

Paje. Midline vs Peripherally Inserted Central Catheter for Outpatient Parenteral Antimicrobial Therapy. *JAMA Intern Med.* Published November 11, 2024.

doi:10.1001/jamainternmed.2024.5984

### Data

**Data available:** No

### Additional Information

**Explanation for why data not available:** As our initiative is a collaborative of hospitals in Michigan focusing on improving the quality of care for hospitalized patients with PICCs, we utilized the existing infrastructure of the Michigan Hospital Medicine Safety (HMS) Consortium. The data use agreements among the participating hospitals prohibit us from sharing our registry data outside of the Coordinating Center, given hospital specific performance is directly identifiable. For further information, please contact the Institutional Review Board at the University of Michigan (HUM 00078730) at [irbmed@umich.edu](mailto:irbmed@umich.edu).
